# Supplementary material
Source: publisher figshare collection journal article supplement (https://tandf.figshare.com/articles/dataset/_/3370408)
Supplement: Supplementary file 2 [file 3]

Archive with 2 entries (2 files):
- April11_2016NoNames (2).txt
- CarrascoRossiApril27_2016_Appendix.pdf
