# Supplementary material
Source: publisher figshare collection journal article supplement (https://tandf.figshare.com/articles/dataset/_/3370408)
Supplement: Supplementary file 2 [file 3 › April11_2016NoNames (2).txt]

This is pdfeTeXk, Version 3.141592-1.11a-2.1 (Web2c 7.5.2) (format=pdflatex_ml 2004.5.10)  21 APR 2016 12:09
 %&-line parsing enabled.
 (c:\swp55\TCITeX/web2c/cp8bit.tcx)
**&pdflatex_ml C:/Users/Barbara/AppData/Local/Temp/swp0003.tex
(c:/Users/Barbara/AppData/Local/Temp/swp0003.tex{c:\swp55\TCITeX/pdftex/config/
pdftex.cfg}
LaTeX2e <2003/12/01>
Babel <v3.8a> and hyphenation patterns for american, english, french, german, n
german, loaded.
(c:\swp55\TCITeX/tex/latex/base/article.cls
Document Class: article 2004/02/16 v1.4f Standard LaTeX document class
(c:\swp55\TCITeX/tex/latex/base/size11.clo
File: size11.clo 2004/02/16 v1.4f Standard LaTeX file (size option)
)
\c@part=\count79
\c@section=\count80
\c@subsection=\count81
\c@subsubsection=\count82
\c@paragraph=\count83
\c@subparagraph=\count84
\c@figure=\count85
\c@table=\count86
\abovecaptionskip=\skip41
\belowcaptionskip=\skip42
\bibindent=\dimen102
)
(c:\swp55\TCITeX/tex/latex/amsfonts/amssymb.sty
Package: amssymb 2002/01/22 v2.2d

(c:\swp55\TCITeX/tex/latex/amsfonts/amsfonts.sty
Package: amsfonts 2001/10/25 v2.2f
\@emptytoks=\toks14
\symAMSa=\mathgroup4
\symAMSb=\mathgroup5
LaTeX Font Info:    Overwriting math alphabet `\mathfrak' in version `bold'
(Font)                  U/euf/m/n --> U/euf/b/n on input line 132.
))
(c:\swp55\TCITeX/tex/latex/required/graphics/graphicx.sty
Package: graphicx 1999/02/16 v1.0f Enhanced LaTeX Graphics (DPC,SPQR)

(c:\swp55\TCITeX/tex/latex/required/graphics/keyval.sty
Package: keyval 1999/03/16 v1.13 key=value parser (DPC)
\KV@toks@=\toks15
)
(c:\swp55\TCITeX/tex/latex/required/graphics/graphics.sty
Package: graphics 2001/07/07 v1.0n Standard LaTeX Graphics (DPC,SPQR)

(c:\swp55\TCITeX/tex/latex/required/graphics/trig.sty
Package: trig 1999/03/16 v1.09 sin cos tan (DPC)
)
(c:\swp55\TCITeX/tex/latex/required/graphics/graphics.cfg
File: graphics.cfg 
)
Package graphics Info: Driver file: pdftex.def on input line 80.

(c:\swp55\TCITeX/tex/latex/required/graphics/pdftex.def
File: pdftex.def 2002/06/19 v0.03k graphics/color for pdftex
\Gread@gobject=\count87
))
\Gin@req@height=\dimen103
\Gin@req@width=\dimen104
)
(c:\swp55\TCITeX/tex/latex/amsmath/amsmath.sty
Package: amsmath 2000/07/18 v2.13 AMS math features
\@mathmargin=\skip43

For additional information on amsmath, use the `?' option.
(c:\swp55\TCITeX/tex/latex/amsmath/amstext.sty
Package: amstext 2000/06/29 v2.01

(c:\swp55\TCITeX/tex/latex/amsmath/amsgen.sty
File: amsgen.sty 1999/11/30 v2.0
\@emptytoks=\toks16
\ex@=\dimen105
))
(c:\swp55\TCITeX/tex/latex/amsmath/amsbsy.sty
Package: amsbsy 1999/11/29 v1.2d
\pmbraise@=\dimen106
)
(c:\swp55\TCITeX/tex/latex/amsmath/amsopn.sty
Package: amsopn 1999/12/14 v2.01 operator names
)
\inf@bad=\count88
LaTeX Info: Redefining \frac on input line 211.
\uproot@=\count89
\leftroot@=\count90
LaTeX Info: Redefining \overline on input line 307.
\classnum@=\count91
\DOTSCASE@=\count92
LaTeX Info: Redefining \ldots on input line 379.
LaTeX Info: Redefining \dots on input line 382.
LaTeX Info: Redefining \cdots on input line 467.
\Mathstrutbox@=\box26
\strutbox@=\box27
\big@size=\dimen107
LaTeX Font Info:    Redeclaring font encoding OML on input line 567.
LaTeX Font Info:    Redeclaring font encoding OMS on input line 568.
\macc@depth=\count93
\c@MaxMatrixCols=\count94
\dotsspace@=\muskip10
\c@parentequation=\count95
\dspbrk@lvl=\count96
\tag@help=\toks17
\row@=\count97
\column@=\count98
\maxfields@=\count99
\andhelp@=\toks18
\eqnshift@=\dimen108
\alignsep@=\dimen109
\tagshift@=\dimen110
\tagwidth@=\dimen111
\totwidth@=\dimen112
\lineht@=\dimen113
\@envbody=\toks19
\multlinegap=\skip44
\multlinetaggap=\skip45
\mathdisplay@stack=\toks20
LaTeX Info: Redefining \[ on input line 2666.
LaTeX Info: Redefining \] on input line 2667.
)
(c:\swp55\TCITeX/tex/latex/contrib/rotating/rotating.sty
Package: rotating 1997/09/26, v2.13 Rotation package

(c:\swp55\TCITeX/tex/latex/base/ifthen.sty
Package: ifthen 2001/05/26 v1.1c Standard LaTeX ifthen package (DPC)
)
\c@r@tfl@t=\count100
\rot@float@box=\box28
)
\c@theorem=\count101
\msipdfoutput=\count102
 (./swp0003.aux)
\openout1 = `swp0003.aux'.

LaTeX Font Info:    Checking defaults for OML/cmm/m/it on input line 74.
LaTeX Font Info:    ... okay on input line 74.
LaTeX Font Info:    Checking defaults for T1/cmr/m/n on input line 74.
LaTeX Font Info:    ... okay on input line 74.
LaTeX Font Info:    Checking defaults for OT1/cmr/m/n on input line 74.
LaTeX Font Info:    ... okay on input line 74.
LaTeX Font Info:    Checking defaults for OMS/cmsy/m/n on input line 74.
LaTeX Font Info:    ... okay on input line 74.
LaTeX Font Info:    Checking defaults for OMX/cmex/m/n on input line 74.
LaTeX Font Info:    ... okay on input line 74.
LaTeX Font Info:    Checking defaults for U/cmr/m/n on input line 74.
LaTeX Font Info:    ... okay on input line 74.
LaTeX Font Info:    Try loading font information for U+msa on input line 77.

(c:\swp55\TCITeX/tex/latex/amsfonts/umsa.fd
File: umsa.fd 2002/01/19 v2.2g AMS font definitions
)
LaTeX Font Info:    Try loading font information for U+msb on input line 77.

(c:\swp55\TCITeX/tex/latex/amsfonts/umsb.fd
File: umsb.fd 2002/01/19 v2.2g AMS font definitions
)

LaTeX Warning: No \author given.

[1

{c:\swp55\TCITeX/pdftex/config/TrueTeX.map}{c:\swp55\TCITeX/pdftex/config/WinFo
nts.map}{c:\swp55\TCITeX/pdftex/config/msi.map}] [2] [3] [4] [5] [6] [7]
[8] [9] [10]
Overfull \hbox (6.86777pt too wide) in paragraph at lines 707--719
[]/dcbx10@10.95pt/Assumption 1/dcti10@10.95pt/. /dcr10@10.95pt/As-sume that $/c
mmi10@10.95pt/y[] /cmr10@10.95pt/= /cmmi10@10.95pt/x[]^^N /cmr10@10.95pt/+ /cmm
i10@10.95pt/"[];$ $t /cmr10@10.95pt/= 1/cmmi10@10.95pt/; :::; T;$ /dcr10@10.95p
t/where the re-gres-sor $/cmmi10@10.95pt/x[]$ /dcr10@10.95pt/is a $/cmmi10@10.9
5pt/N/cmsy10@10.95pt/^^@$/dcr10@10.95pt/dimensional
 []

[11] [12] [13] [14] [15] [16] [17] [18] [19] [20]
Overfull \hbox (25.2628pt too wide) in paragraph at lines 1389--1389
[]/dcbx12@14.4pt/Data-driven Se-lec-tion of the Tun-ing Pa-ra-me-ter via Cross-
Validation 
 []

[21] [22] [23] [24]
Overfull \hbox (8.63264pt too wide) in paragraph at lines 1640--1643
[]/dcr10@10.95pt/(/dcti10@10.95pt/DGP 2: Many Fac-tors Struc-ture/dcr10@10.95pt
/) $/cmmi10@10.95pt/^^R$ /dcr10@10.95pt/is the $[]$ vec-tor of ones with $/cmmi
10@10.95pt/r /cmr10@10.95pt/= 50$/dcr10@10.95pt/; $/cmmi10@10.95pt/r[] /cmr10@1
0.95pt/= [] [] /cmmi10@10.95pt/:$ 
 []

[25] [26]
Underfull \hbox (badness 1742) in paragraph at lines 1762--1762
/dcr9/DGP 2: for Ridge, $/cmmi9/^^K=N$/dcr9/=0:0.0001:0.01; and for LF: $/cmmi9
/^^K=N$/dcr9/=0.00001:0.00001:0.0002; DGP 3: for Ridge,
 []

[27] [28] [29] [30] [31] [32] [33] [34] [35] [36] [37] [38] [39] [40] [41]
[42] [43] [44] [45] [46] [47] [48] [49] [50] [51]
Overfull \hbox (19.43385pt too wide) in paragraph at lines 3249--3286
 [][] 
 []


Overfull \hbox (57.58577pt too wide) in paragraph at lines 3294--3331
 [][] 
 []


LaTeX Font Warning: Command \small invalid in math mode on input line 3343.


LaTeX Font Warning: Command \small invalid in math mode on input line 3343.

[52]
Overfull \hbox (19.43385pt too wide) in paragraph at lines 3403--3440
 [][] 
 []

[53]
Overfull \hbox (19.43385pt too wide) in paragraph at lines 3488--3524
 [] 
 []


LaTeX Font Warning: Command \small invalid in math mode on input line 3572.


LaTeX Font Warning: Command \small invalid in math mode on input line 3572.

[54]
Overfull \hbox (19.43385pt too wide) in paragraph at lines 3632--3669
 [][] 
 []


LaTeX Font Warning: Command \small invalid in math mode on input line 3676.


LaTeX Font Warning: Command \small invalid in math mode on input line 3678.


LaTeX Font Warning: Command \small invalid in math mode on input line 3684.


LaTeX Font Warning: Command \small invalid in math mode on input line 3686.


LaTeX Font Warning: Command \small invalid in math mode on input line 3688.


LaTeX Font Warning: Command \small invalid in math mode on input line 3689.


LaTeX Font Warning: Command \small invalid in math mode on input line 3689.


LaTeX Font Warning: Command \small invalid in math mode on input line 3689.


LaTeX Font Warning: Command \small invalid in math mode on input line 3690.


LaTeX Font Warning: Command \small invalid in math mode on input line 3690.


LaTeX Font Warning: Command \small invalid in math mode on input line 3691.


LaTeX Font Warning: Command \small invalid in math mode on input line 3691.


LaTeX Font Warning: Command \small invalid in math mode on input line 3691.


LaTeX Font Warning: Command \small invalid in math mode on input line 3692.


LaTeX Font Warning: Command \small invalid in math mode on input line 3692.


LaTeX Font Warning: Command \small invalid in math mode on input line 3693.


LaTeX Font Warning: Command \small invalid in math mode on input line 3694.


LaTeX Font Warning: Command \small invalid in math mode on input line 3697.

[55]
Overfull \hbox (78.60764pt too wide) in paragraph at lines 3705--3745
 [] 
 []


Overfull \hbox (75.56673pt too wide) in paragraph at lines 3749--3788
 [][] 
 []

[56]

LaTeX Font Warning: Command \small invalid in math mode on input line 3797.


LaTeX Font Warning: Command \small invalid in math mode on input line 3798.


LaTeX Font Warning: Command \small invalid in math mode on input line 3798.


LaTeX Font Warning: Command \small invalid in math mode on input line 3798.

[57]
Overfull \hbox (72.48706pt too wide) in paragraph at lines 3803--3838
 [][] 
 []


Overfull \hbox (72.48706pt too wide) in paragraph at lines 3842--3877
 [][] 
 []

[58]

LaTeX Font Warning: Command \small invalid in math mode on input line 3888.


LaTeX Font Warning: Command \small invalid in math mode on input line 3889.


LaTeX Font Warning: Command \small invalid in math mode on input line 3889.


LaTeX Font Warning: Command \small invalid in math mode on input line 3889.


LaTeX Font Warning: Command \small invalid in math mode on input line 3890.


LaTeX Font Warning: Command \small invalid in math mode on input line 3890.


LaTeX Font Warning: Command \small invalid in math mode on input line 3890.


LaTeX Font Warning: Command \small invalid in math mode on input line 3890.

[59] [60]

LaTeX Font Warning: Command \small invalid in math mode on input line 3970.


LaTeX Font Warning: Command \small invalid in math mode on input line 3970.


LaTeX Font Warning: Command \small invalid in math mode on input line 3970.


LaTeX Font Warning: Command \small invalid in math mode on input line 3971.


<C:/Users/Barbara/AppData/Local/Temp/graphics/Figure1__1.pdf, id=257, 555.68602
pt x 276.25208pt>
File: C:/Users/Barbara/AppData/Local/Temp/graphics/Figure1__1.pdf Graphic file 
(type pdf)

<use C:/Users/Barbara/AppData/Local/Temp/graphics/Figure1__1.pdf>
Overfull \hbox (96.14635pt too wide) in paragraph at lines 3976--4001
 []$[]$ 
 []

[61]
<C:/Users/Barbara/AppData/Local/Temp/graphics/Figure2__2.pdf, id=262, 556.32843
pt x 276.89445pt>
File: C:/Users/Barbara/AppData/Local/Temp/graphics/Figure2__2.pdf Graphic file 
(type pdf)

<use C:/Users/Barbara/AppData/Local/Temp/graphics/Figure2__2.pdf>
Overfull \hbox (96.60194pt too wide) in paragraph at lines 4002--4027
 []$[]$ 
 []


<C:/Users/Barbara/AppData/Local/Temp/graphics/Figure3__3.pdf, id=263, 556.32843
pt x 276.89445pt>
File: C:/Users/Barbara/AppData/Local/Temp/graphics/Figure3__3.pdf Graphic file 
(type pdf)

<use C:/Users/Barbara/AppData/Local/Temp/graphics/Figure3__3.pdf>
Overfull \hbox (96.60194pt too wide) in paragraph at lines 4028--4053
 []$[]$ 
 []

[62 <c:/Users/Barbara/AppData/Local/Temp/graphics/Figure1__1.pdf> <c:/Users/Bar
bara/AppData/Local/Temp/graphics/Figure2__2.pdf>]
<C:/Users/Barbara/AppData/Local/Temp/graphics/Figure4__4.pdf, id=279, 555.68602
pt x 276.25208pt>
File: C:/Users/Barbara/AppData/Local/Temp/graphics/Figure4__4.pdf Graphic file 
(type pdf)

<use C:/Users/Barbara/AppData/Local/Temp/graphics/Figure4__4.pdf>
Overfull \hbox (96.14635pt too wide) in paragraph at lines 4054--4079
 []$[]$ 
 []


<C:/Users/Barbara/AppData/Local/Temp/graphics/Figure5__5.pdf, id=280, 556.97386
pt x 276.89445pt>
File: C:/Users/Barbara/AppData/Local/Temp/graphics/Figure5__5.pdf Graphic file 
(type pdf)

<use C:/Users/Barbara/AppData/Local/Temp/graphics/Figure5__5.pdf>
Overfull \hbox (97.1281pt too wide) in paragraph at lines 4086--4110
 []$[]$ 
 []

[63 <c:/Users/Barbara/AppData/Local/Temp/graphics/Figure3__3.pdf> <c:/Users/Bar
bara/AppData/Local/Temp/graphics/Figure4__4.pdf>]
<C:/Users/Barbara/AppData/Local/Temp/graphics/Figure6__6.pdf, id=296, 556.32843
pt x 276.89445pt>
File: C:/Users/Barbara/AppData/Local/Temp/graphics/Figure6__6.pdf Graphic file 
(type pdf)

<use C:/Users/Barbara/AppData/Local/Temp/graphics/Figure6__6.pdf>
Overfull \hbox (96.60194pt too wide) in paragraph at lines 4111--4135
 []$[]$ 
 []


<C:/Users/Barbara/AppData/Local/Temp/graphics/Figure7__7.pdf, id=297, 555.68602
pt x 276.25208pt>
File: C:/Users/Barbara/AppData/Local/Temp/graphics/Figure7__7.pdf Graphic file 
(type pdf)

<use C:/Users/Barbara/AppData/Local/Temp/graphics/Figure7__7.pdf>
Overfull \hbox (96.14635pt too wide) in paragraph at lines 4136--4160
 []$[]$ 
 []

[64 <c:/Users/Barbara/AppData/Local/Temp/graphics/Figure5__5.pdf> <c:/Users/Bar
bara/AppData/Local/Temp/graphics/Figure6__6.pdf>]
<C:/Users/Barbara/AppData/Local/Temp/graphics/Figure8__8.pdf, id=313, 556.32843
pt x 276.89445pt>
File: C:/Users/Barbara/AppData/Local/Temp/graphics/Figure8__8.pdf Graphic file 
(type pdf)

<use C:/Users/Barbara/AppData/Local/Temp/graphics/Figure8__8.pdf>
Overfull \hbox (96.60194pt too wide) in paragraph at lines 4161--4185
 []$[]$ 
 []


LaTeX Font Warning: Command \small invalid in math mode on input line 4192.


LaTeX Font Warning: Command \small invalid in math mode on input line 4192.


LaTeX Font Warning: Command \small invalid in math mode on input line 4192.


LaTeX Font Warning: Command \small invalid in math mode on input line 4192.

[65 <c:/Users/Barbara/AppData/Local/Temp/graphics/Figure7__7.pdf> <c:/Users/Bar
bara/AppData/Local/Temp/graphics/Figure8__8.pdf>]

LaTeX Font Warning: Command \small invalid in math mode on input line 4200.


LaTeX Font Warning: Command \small invalid in math mode on input line 4200.


LaTeX Font Warning: Command \small invalid in math mode on input line 4200.


LaTeX Font Warning: Command \small invalid in math mode on input line 4201.

[66] [67]

LaTeX Font Warning: Command \small invalid in math mode on input line 4280.


LaTeX Font Warning: Command \small invalid in math mode on input line 4280.


LaTeX Font Warning: Command \small invalid in math mode on input line 4281.


LaTeX Font Warning: Command \small invalid in math mode on input line 4281.


LaTeX Font Warning: Command \small invalid in math mode on input line 4281.


LaTeX Font Warning: Command \small invalid in math mode on input line 4281.


LaTeX Font Warning: Command \small invalid in math mode on input line 4282.


LaTeX Font Warning: Command \small invalid in math mode on input line 4282.


<C:/Users/Barbara/AppData/Local/Temp/graphics/FigureA1__9.pdf, id=336, 483.0837
9pt x 240.04982pt>
File: C:/Users/Barbara/AppData/Local/Temp/graphics/FigureA1__9.pdf Graphic file
 (type pdf)

<use C:/Users/Barbara/AppData/Local/Temp/graphics/FigureA1__9.pdf>
Overfull \hbox (23.36151pt too wide) in paragraph at lines 4291--4315
 []$[]$ 
 []

[68]
<C:/Users/Barbara/AppData/Local/Temp/graphics/FigureA2__10.pdf, id=340, 484.056
41pt x 240.77855pt>
File: C:/Users/Barbara/AppData/Local/Temp/graphics/FigureA2__10.pdf Graphic fil
e (type pdf)

<use C:/Users/Barbara/AppData/Local/Temp/graphics/FigureA2__10.pdf>
Overfull \hbox (24.36317pt too wide) in paragraph at lines 4316--4340
 []$[]$ 
 []


<C:/Users/Barbara/AppData/Local/Temp/graphics/FigureA3__11.pdf, id=341, 483.569
61pt x 240.29172pt>
File: C:/Users/Barbara/AppData/Local/Temp/graphics/FigureA3__11.pdf Graphic fil
e (type pdf)

<use C:/Users/Barbara/AppData/Local/Temp/graphics/FigureA3__11.pdf>
Overfull \hbox (23.84708pt too wide) in paragraph at lines 4341--4365
 []$[]$ 
 []

[69 <c:/Users/Barbara/AppData/Local/Temp/graphics/FigureA1__9.pdf> <c:/Users/Ba
rbara/AppData/Local/Temp/graphics/FigureA2__10.pdf>]
<C:/Users/Barbara/AppData/Local/Temp/graphics/FigureA4__12.pdf, id=357, 484.056
41pt x 240.77855pt>
File: C:/Users/Barbara/AppData/Local/Temp/graphics/FigureA4__12.pdf Graphic fil
e (type pdf)

<use C:/Users/Barbara/AppData/Local/Temp/graphics/FigureA4__12.pdf>
Overfull \hbox (24.36317pt too wide) in paragraph at lines 4366--4390
 []$[]$ 
 []


LaTeX Font Warning: Command \small invalid in math mode on input line 4399.


LaTeX Font Warning: Command \small invalid in math mode on input line 4399.


LaTeX Font Warning: Command \small invalid in math mode on input line 4399.


LaTeX Font Warning: Command \small invalid in math mode on input line 4400.


LaTeX Font Warning: Command \small invalid in math mode on input line 4400.


LaTeX Font Warning: Command \small invalid in math mode on input line 4400.


LaTeX Font Warning: Command \small invalid in math mode on input line 4401.


LaTeX Font Warning: Command \small invalid in math mode on input line 4401.

[70 <c:/Users/Barbara/AppData/Local/Temp/graphics/FigureA3__11.pdf> <c:/Users/B
arbara/AppData/Local/Temp/graphics/FigureA4__12.pdf>] (./swp0003.aux) ) 
Here is how much of TeX's memory you used:
 1772 strings out of 95282
 22424 string characters out of 1187734
 91770 words of memory out of 1519920
 4768 multiletter control sequences out of 10000+50000
 36496 words of font info for 96 fonts, out of 1000000 for 2000
 22 hyphenation exceptions out of 1000
 27i,18n,24p,274b,345s stack positions out of 5000i,500n,6000p,200000b,40000s
 372 PDF objects out of 300000
 0 named destinations out of 131072
 61 words of extra memory for PDF output out of 65536
{c:\swp5
5\TCITeX/fonts/type1/cmr9.enc}<c:\swp55\TCITeX/fonts/truetype/cmr9.ttf>{c:\swp5
5\TCITeX/fonts/type1/cmmi5.enc}<c:\swp55\TCITeX/fonts/truetype/cmmi5.ttf>{c:\sw
p55\TCITeX/fonts/type1/cmsy9.enc}<c:\swp55\TCITeX/fonts/truetype/cmsy9.ttf>{c:\
swp55\TCITeX/fonts/type1/cmr5.enc}<c:\swp55\TCITeX/fonts/truetype/cmr5.ttf>{c:\
swp55\TCITeX/fonts/type1/cmsy5.enc}<c:\swp55\TCITeX/fonts/truetype/cmsy5.ttf>{c
:\swp55\TCITeX/fonts/type1/cmsy6.enc}<c:\swp55\TCITeX/fonts/truetype/cmsy6.ttf>
{c:\swp55\TCITeX/fonts/type1/cmex8.enc}<c:\swp55\TCITeX/fonts/truetype/cmex8.tt
f>{c:\swp55\TCITeX/fonts/type1/cmmi6.enc}<c:\swp55\TCITeX/fonts/truetype/cmmi6.
ttf>{c:\swp55\TCITeX/fonts/type1/cmr6.enc}<c:\swp55\TCITeX/fonts/truetype/cmr6.
ttf>{c:\swp55\TCITeX/fonts/type1/cmmi9.enc}<c:\swp55\TCITeX/fonts/truetype/cmmi
9.ttf>{c:\swp55\TCITeX/fonts/type1/cmex9.enc}<c:\swp55\TCITeX/fonts/truetype/cm
ex9.ttf>{c:\swp55\TCITeX/fonts/type1/msbm10.enc}<c:\swp55\TCITeX/fonts/truetype
/msbm10.ttf>{c:\swp55\TCITeX/fonts/type1/cmr8.enc}<c:\swp55\TCITeX/fonts/truety
pe/cmr8.ttf>{c:\swp55\TCITeX/fonts/type1/cmex10.enc}<c:\swp55\TCITeX/fonts/true
type/cmex10.ttf>{c:\swp55\TCITeX/fonts/type1/cmmi8.enc}<c:\swp55\TCITeX/fonts/t
ruetype/cmmi8.ttf>{c:\swp55\TCITeX/fonts/type1/cmsy8.enc}<c:\swp55\TCITeX/fonts
/truetype/cmsy8.ttf>{c:\swp55\TCITeX/fonts/type1/cmsy10.enc}<c:\swp55\TCITeX/fo
nts/truetype/cmsy10.ttf>{c:\swp55\TCITeX/fonts/type1/cmr10.enc}<c:\swp55\TCITeX
/fonts/truetype/cmr10.ttf>{c:\swp55\TCITeX/fonts/type1/cmmi10.enc}<c:\swp55\TCI
TeX/fonts/truetype/cmmi10.ttf>{c:\swp55\TCITeX/fonts/type1/dcti10.enc}<c:\swp55
\TCITeX/fonts/truetype/dcti10.ttf>{c:\swp55\TCITeX/fonts/type1/dcbx10.enc}<c:\s
wp55\TCITeX/fonts/truetype/dcbx10.ttf>{c:\swp55\TCITeX/fonts/type1/dcr10.enc}<c
:\swp55\TCITeX/fonts/truetype/dcr10.ttf>
Output written on swp0003.pdf (70 pages, 584364 bytes).
